# Supplementary material for: A novel cutoff for the waist-to-height ratio predicting metabolic syndrome in young American adults
Source: BMC Public Health. 2016 Apr 1;16:295. doi: 10.1186/s12889-016-2964-6 (PMC4818465; doi:10.1186/s12889-016-2964-6)
Supplement: Additional file 1: Table S1. — Add Health Source Variables Used for Analysis (XLSX 38 kb) [file 12889_2016_2964_MOESM1_ESM.xlsx]

## Sheet: Sheet1
Table S1. Add Health Source Variables Used for Analysis
Variable	Description
H4HGT	Height (cm)
H4WAIST	Waist Circumference (cm)
BIO_SEX	Sex
AGE_W4	Age at Screeing (years)
AH_RACE	Race/Ethnicity
H4TO5	During the last 30 days, on how many days did you smoke cigarettes?
HBA1C	Glycohemoglobin (%)
HDL	HDL Decile
TG	Triglyceride Decile
H4SBP	Systolic Blood Pressure (mm Hg)
H4DBP	Diastolic Blood Pressure (mm Hg)
GSWGT4	Wave 4 Sampling Weights
REGION	Wave 4 Strata Variable
PSUSCID	Wave 4 Cluster Variable
