# Supplementary material for: A novel cutoff for the waist-to-height ratio predicting metabolic syndrome in young American adults
Source: BMC Public Health. 2016 Apr 1;16:295. doi: 10.1186/s12889-016-2964-6 (PMC4818465; doi:10.1186/s12889-016-2964-6)
Supplement: Additional file 3: Table S2. — NHANES Source Variables Used for Validation Analysis (XLSX 46 kb) [file 12889_2016_2964_MOESM3_ESM.xlsx]

## Sheet: Sheet1
Table S2. NHANES Source Variables Used for Validation Analysis
Variable	Description
BMXHT	Height (cm)
BMXWAIST	Waist Circumference (cm)
RIAGENDER	Sex
RIDAGEYR	Age at Screeing (months)
RIDRETH1	Race/Ethnicity
SMQ040	Do you now smoke cigarettes?
LBXGH	Glycohemoglobin (%)
LBDHDD	Direct HDL-Cholesterol (mg/dL)
LBXTR	Triglyceride (mg/dL)
BPXSY1	Systolic: Blood Pressure (mm Hg) (1st Reading)
BPXSY2	Systolic: Blood Pressure (mm Hg) (2nd Reading)
BPXSY3	Systolic: Blood Pressure (mm Hg) (3rd Reading)
BPXDI1	Diastolic: Blood Pressure (mm Hg) (1st Reading)
BPXDI2	Diastolic: Blood Pressure (mm Hg) (2nd Reading)
BPXDI3	Diastolic: Blood Pressure (mm Hg) (3rd Reading)
