# Supplementary material for: A novel cutoff for the waist-to-height ratio predicting metabolic syndrome in young American adults
Source: BMC Public Health. 2016 Apr 1;16:295. doi: 10.1186/s12889-016-2964-6 (PMC4818465; doi:10.1186/s12889-016-2964-6)
Supplement: Additional file 4: Table S3. — Descriptives Statistics: Subsample of National Health and Nutrition Examination Survey, 2005-2008, n = 1 236 (XLSX 33 kb) [file 12889_2016_2964_MOESM4_ESM.xlsx]

## Sheet: Sheet1
Table S3. Descriptives Statistics: Subsample of National Health and Nutrition Examination Survey, 2005-2008, n = 1 236
	Metabolic Syndrome
Variable	Yes n = 300	%	No n = 936	%
Sex
Males	156	0.52	554	0.59188
Females	144	0.48	382	0.40812
Race
Mexican American	58	0.193333	124	0.132479
Other Hispanic	35	0.116667	79	0.0844017
NonHispanic White	161	0.536667	508	0.542735
NonHispanic Black	40	0.133333	191	0.20406
Other Race	6	0.02	34	0.0363248
Smoking
Every Day	115	0.383333	402	0.429487
Some Days	17	0.0566667	76	0.0811966
Not at All	168	0.56	458	0.489316
Metabolic Outcomes
High Waist Circumference	275	0.916667	375	0.400641
High Triglycerides	240	0.8	207	0.221154
High Blood Glucose	229	0.763333	217	0.231838
Low High Densitiy Lipoprotein	224	0.746667	142	0.151709
Hypertension	35	0.116667	29	0.0309829
	Mean	SE	Mean	SE
Waist-to-Height Ratio	0.6512	0.00409757	0.5569	0.00276759
Body Mass Index	32.33	0.314395	26.79	0.180331
