# Supplementary material for: A novel cutoff for the waist-to-height ratio predicting metabolic syndrome in young American adults
Source: BMC Public Health. 2016 Apr 1;16:295. doi: 10.1186/s12889-016-2964-6 (PMC4818465; doi:10.1186/s12889-016-2964-6)
Supplement: Additional file 5: Table S4. — Unweighted Logistic Regression Predicting Presence of Metabolic Syndrome from WHtR Cutoff: National Health and Nutrition Examination Survey, 2005-2008, n = 1 236 (XLSX 48 kb) [file 12889_2016_2964_MOESM5_ESM.xlsx]

## Sheet: Sheet1
Table S4. Unweighted Logistic Regression Predicting Presence of Metabolic Syndrome from WHtR Cutoff: National Health and Nutrition Examination Survey, 2005-2008, n = 1 236
	Full Sample		Females Only		Males Only
	OR	P Value	OR	P Value	OR	P Value
WHtR Cutoff	8.9 (6.2, 12.7)	< 0.001	9.9 (5.7, 17.2)	< 0.001	8.5 (5.2, 14.0)	< 0.001
Race
Mexican American	1.5 (1.0, 2.3)	0.0427	1.7 (0.9, 3.2)	0.1075	1.3 (0.8, 2.2)	0.3545
Other Hispanic	1.4 (0.8, 2.3)	0.1983	2.2 (1.0, 4.6)	0.0452	1.0 (0.5, 1.9)	0.9829
NonHispanic White	Ref	Ref	Ref	Ref	Ref	Ref
NonHispanic Black	0.7 (0.5, 1.1)	0.1227	1.0 (0.5, 1.8)	0.8933	0.5 (0.3, 1.0)	0.0567
Other Race	0.6 (0.2, 1.6)	0.323	1.0 (0.3, 3.2)	0.9821	0.3 (0.0, 2.2)	0.2247
Smoking
Every Day	Ref	Ref	Ref	Ref	Ref	Ref
Some Days	1.1 (0.6, 2.1)	0.7857	1.5 (0.6, 3.8)	0.4352	0.8 (0.3, 2.0)	0.6084
Not At All	0.7 (0.5, 0.9)	0.0214	0.7 (0.4, 1.1)	0.1645	0.7 (0.5, 1.1)	0.1436
Sex
Male	Ref	Ref	-	-	-	-
Female	1.4 (1.0, 1.8)	0.0424	-	-	-	-
Age	1.02 (1.01, 1.03)	< 0.001	1.0 (1.0, 1.1)	< 0.001	1.0 (1.0, 1.02)	0.0439
