# Supplementary material for: A novel cutoff for the waist-to-height ratio predicting metabolic syndrome in young American adults
Source: BMC Public Health. 2016 Apr 1;16:295. doi: 10.1186/s12889-016-2964-6 (PMC4818465; doi:10.1186/s12889-016-2964-6)
Supplement: Additional file 6: Table S5. — Weighted Logistic Regression Predicting Presence of Metabolic Syndrome from WHtR Cutoff: National Health and Nutrition Examination Survey, 2005-2008, n = 1 236 (XLSX 44 kb) [file 12889_2016_2964_MOESM6_ESM.xlsx]

## Sheet: Sheet1
Table S5. Weighted Logistic Regression Predicting Presence of Metabolic Syndrome from WHtR Cutoff: National Health and Nutrition Examination Survey, 2005-2008, n = 1 236
	Full Sample
	OR	P Value
WHtR Cutoff	9.8 (6.2, 15.3)	< 0.001
Race
Mexican American	1.8 (1.3, 2.5)	0.003999
Other Hispanic	1.7 (0.8, 3.6)	0.195405
NonHispanic White	Ref	Ref
NonHispanic Black	0.6 (0.4, 1.0)	0.063061
Other Race	0.8 (0.3, 1.9)	0.592209
Smoking
Every Day	Ref	Ref
Some Days	0.7 (0.3, 1.2)	0.200315
Not At All	0.8 (0.5, 1.1)	0.136465
Sex
Male	Ref	Ref
Female	1.1 (0.8, 1.7)	0.491311
Age	1.0 (1.01, 1.03)	< 0.001
